# Supplementary material
Source: publisher site journal article supplement (https://www.dovepress.com/get_supplementary_file.php?f=335494.docx)
Supplement: Supplementary file 1 [file get_supplementary_file.php]

**Supplemental Materials**

**Supplemental Methods**

**Supplemental Table 1.** Association of male sex with test positivity among individuals who received a SARS-CoV-2 PCR test

**Supplemental Table 2.** Association of male sex with hospitalization among individuals who received a positive SARS-CoV-2 PCR test

**Supplemental Table 3.** Association of male sex with death among individuals who received a positive SARS-CoV-2 PCR test

**Supplemental Table 4.** Evaluation of factors mediating the relationship between male sex and severe COVID-19 disease(using observed, un-imputed inflammatory marker data)

**References for Supplemental Materials**

**Supplemental Methods**

*Covariates*

We defined age in years at the time of the first positive SARS-CoV-2 PCR result for individuals who received any positive result and the last negative PCR result for individuals who did not test positive during our observation period. We combined race/ethnicity from its two separate variables that are captured in the EMR into a single composite variable. Preferred language and place of birth are generally recorded in the EMR at the time of initial contact with the UWM. We categorized insurance type as income-requiring, meaning that individuals were on Medicaid or another income-based insurance type versus not. Area Deprivation Index (ADI) percentile, a composite ecologic measure of socioeconomic status that considers factors related to income, education, employment and housing quality1,2, was linked to individuals by ZIP codes in the EMR. Where available, we matched individuals to their ADI percentile using their nine-digit ZIP to ensure the most accurate classification. If individuals only had a 5-digit ZIP recorded, we matched them to the median estimated ADI for that 5-digit ZIP area. Using income type and ADI data, we derived a composite, binary SES variable, where individuals who lived in an area with ADI percentile >50% (i.e., living in the 50% of areas with the highest levels of area deprivation) or were on income-based insurance were classified as lower SES. We calculated body mass index (BMI) as kg/m2 using height and weight at the first positive test or last negative test for individuals who never tested positive. Of note, BMI was only calculated for persons 18 years of age or older, given that persons younger than 18 years of age have different parameters for body mass calculations 3. We calculated the Charlson Comorbidity Index (CCI), a summary of individual comorbidities that has been shown to predict 10-year mortality4, based on International Classification of Diseases (ICD) 9 and 10 diagnostic codes available in the EMR. The CCI score has a possible range of 0-33 and considers diagnoses of the following conditions: cardiovascular disease (myocardial infarction, congestive heart failure, coronary artery disease, cerebrovascular accident), dementia, COPD, connective tissue disease, peptic ulcer disease, liver disease, diabetes, hemiplegia, chronic kidney disease, cancer and HIV/AIDS. As ICD codes are only entered into the EMR upon diagnosis of a condition, we assumed individuals were not diagnosed with a comorbidity if respective ICD codes were not recorded in their EMR. For individuals who received a positive COVID-19 test, we collected available data within 14 days afterwards on blood-based concentrations of eight inflammatory markers that we hypothesized to be associated with COVID-19 infection based on the literature. These markers and the respective upper limit of the reference range for normal concentrations were: interleukin (IL)-6 (6 pg/mL), erythrocyte sedimentation rate (ESR) (10-20 mm/hr depending on sex/age category), ferritin (230 ng/mL for males, 180 ng/mL for females), high sensitivity C reactive protein (HSCRP) (10 mg/L), lactate dehydrogenase (LDH) (210 U/L), lymphocytes (4.8-8.5 thousand/µL depending on age category), neutrophils (5-7.5 thousand/µL depending on age category), and white blood cells (10-17 thousand/µL depending on age category)5. If multiple measurements were taken, we included the one collected closest to the positive test date. An ordinal inflammation variable indicating the number of inflammatory markers (0 to 8) above the upper limit of the normal reference range was constructed for use in our analyses.

**Supplemental Table 1.** Association of male sex with test positivity among individuals who received a SARS-CoV-2 PCR test

|  | **Males** | **Females** | **Unadjusted** | **Adjusteda** |  |
| --- | --- | --- | --- | --- | --- |
|  | Positive Tests/  Individuals (%) | Positive Tests/  Individuals (%) | RR (95% CI) p-value | RR (95% CI) p-value | Interaction p-valueb |
| Overall | 1,469/32,919 (4.5%) | 1,372/34,733 (4.0%) | 1.13 (1.05-1.21); <0.001 | 1.14 (1.06-1.23); <0.001 | -- |
| Age |  |  |  |  |  |
| 0-49 years | 845/16,774 (5.0%) | 846/19,608 (4.3%) | 1.17 (1.06-1.28); 0.001 | 1.17 (1.07-1.28); 0.001 | *Ref* |
| 50-69 years | 443/11,526 (3.8%) | 362/10,703 (3.4%) | 1.14 (0.99-1.30); 0.07 | 1.12 (0.98-1.29); 0.10 | 0.52 |
| 70+ years | 181/4,612 (3.9%) | 164/4,417 (3.7%) | 1.06 (0.86-1.30); 0.60 | 1.19 (0.97-1.47); 0.09 | 0.54 |
| Race/ethnicity |  |  |  |  |  |
| Non-Latinx White | 367/13,922 (2.6%) | 283/13,754 (2.1%) | 1.21 (1.06-1.38); 0.004 | 1.21 (1.06-1.38); 0.004 | *Ref* |
| Non-Latinx Black | 161/2,739 (5.9%) | 152/2,216 (6.9%) | 0.92 (0.76-1.12); 0.40 | 0.93 (0.77-1.13); 0.46 | 0.02 |
| Latina/o | 340/2,718 (12.5%) | 300/2,821 (10.6%) | 1.21 (1.07-1.37); 0.002 | 1.22 (1.08-1.38); 0.002 | 0.99 |
| Asian/Asian American | 84/2,035 (4.1%) | 97/2,471 (3.9%) | 1.07 (0.81-1.41); 0.64 | 1.05 (0.8-1.39); 0.71 | 0.43 |
| Native Alaskan/American/Hawaiian | 40/609 (6.6%) | 48/666 (7.2%) | 1.00 (0.65-1.51); 0.98 | 1.01 (0.66-1.53); 0.97 | 0.40 |
| Socioeconomic status |  |  |  |  |  |
| Lower SES | 605/12,796 (4.7%) | 528/13,087 (4.0%) | 1.18 (1.06-1.32); 0.002 | 1.2 (1.08-1.33); 0.001 | 0.18 |
| Higher SES | 619/17,622 (3.5%) | 654/19,513 (3.4%) | 1.07 (0.96-1.19); 0.20 | 1.09 (0.98-1.21); 0.11 | *Ref* |
| Preferred language other than English |  |  |  |  |  |
| Yes | 368/2,356 (15.6%) | 311/2,481 (12.5%) | 1.24 (1.07-1.42); 0.003 | 1.22 (1.06-1.40); 0.005 | 0.24 |
| No | 1086/30,345 (3.6%) | 1042/32,036 (3.3%) | 1.1 (1.01-1.19); 0.03 | 1.11 (1.02-1.20); 0.02 | *Ref* |
| Charlson Comorbidity Index Score |  |  |  |  |  |
| 0 | 920/18,787 (4.9%) | 901/20,907 (4.3%) | 1.14 (1.04-1.24); 0.005 | 1.14 (1.04-1.25); 0.004 | *Ref* |
| 1 | 122/3,055 (4.0%) | 129/3,523 (3.7%) | 1.09 (0.86-1.39); 0.48 | 1.08 (0.85-1.38); 0.54 | 0.77 |
| 2 | 74/2,025 (3.7%) | 61/1,931 (3.2%) | 1.16 (0.83-1.61); 0.39 | 1.18 (0.85-1.64); 0.33 | 0.91 |
| 3 or more | 353/9,052 (3.9%) | 281/8,372 (3.4%) | 1.16 (1.00-1.36); 0.06 | 1.15 (0.99-1.35); 0.07 | 0.84 |
| CI: confidence interval; RR: relative risk; SES: socioeconomic status;  aAdjusted models controlled for age and race/ethnicity  bThe interaction p-value indicates if the association between male sex and test positivity significantly differs between the given category and the reference category | | | | | |

**Supplemental Table 2**. Association of male sex with hospitalization among individuals who received a positive SARS-CoV-2 PCR test

|  | **Males** | **Females** | **Unadjusted** | **Adjusteda** |  |
| --- | --- | --- | --- | --- | --- |
|  | Hospitalizations/  Individuals (%) | Hospitalizations/  Individuals (%) | RR (95% CI) p-value | RR (95% CI) p-value | Interaction  p-valueb |
| Overall | 288/1,459 (19.7%) | 203/1,363 (14.9%) | 1.33 (1.13-1.56); <0.001 | 1.30 (1.11-1.51); 0.001 | -- |
| Age |  |  |  |  |  |
| 0-49 years | 78/840 (9.3%) | 67/844 (7.9%) | 1.16 (0.85-1.59); 0.34 | 1.08 (0.79-1.46); 0.64 | *Ref* |
| 50-69 years | 122/442 (27.6%) | 64/357 (17.9%) | 1.55 (1.18-2.03); 0.001 | 1.56 (1.19-2.04); 0.001 | 0.18 |
| 70+ years | 88/177 (49.7%) | 72/162 (44.4%) | 1.12 (0.89-1.40); 0.34 | 1.16 (0.91-1.46); 0.23 | 0.86 |
| Race/ethnicity |  |  |  |  |  |
| Non-Latinx White | 90/365 (24.7%) | 51/281 (18.1%) | 1.27 (0.97-1.65); 0.08 | 1.21 (0.95-1.54); 0.12 | *Ref* |
| Non-LatinxBlack | 29/161 (18.0%) | 18/152 (11.8%) | 1.39 (0.82-2.38); 0.23 | 1.26 (0.76-2.09); 0.37 | 0.91 |
| Latinx | 65/338 (19.2%) | 43/298 (14.4%) | 1.31 (0.96-1.77); 0.09 | 1.29 (0.97-1.73); 0.08 | 0.75 |
| Asian/Asian American | 21/84 (25.0%) | 17/95 (17.9%) | 1.40 (0.77-2.56); 0.27 | 1.69 (0.99-2.89); 0.06 | 0.28 |
| Native Alaskan/American/Hawaiian | 8/39 (20.5%) | 5/47 (10.6%) | 1.68 (0.61-4.61); 0.31 | 1.63 (0.61-4.35); 0.33 | 0.56 |
| Socioeconomic status (SES) |  |  |  |  |  |
| Lower SES | 169/601 (28.1%) | 107/524 (20.4%) | 1.34 (1.08-1.66); 0.009 | 1.30 (1.06-1.59); 0.01 | 0.68 |
| Higher SES | 116/615 (18.9%) | 95/649 (14.6%) | 1.27 (0.99-1.63); 0.06 | 1.21 (0.96-1.53); 0.12 | *Ref* |
| Preferred language other than English |  |  |  |  |  |
| Yes | 83/367 (22.6%) | 49/309 (15.9%) | 1.40 (1.02-1.93); 0.04 | 1.55 (1.14-2.12); 0.005 | 0.14 |
| No | 202/1,079 (18.7%) | 151/1,036 (14.6%) | 1.29 (1.07-1.57); 0.009 | 1.21 (1.01-1.45); 0.04 | *Ref* |
| Charlson Comorbidity Index Score |  |  |  |  |  |
| 0 | 61/916 (6.7%) | 42/898 (4.7%) | 1.42 (0.97-2.08); 0.07 | 1.41 (0.96-2.06); 0.08 | *Ref* |
| 1 | 33/121 (27.3%) | 34/129 (26.4%) | 1.03 (0.68-1.55); 0.90 | 1.11 (0.73-1.68); 0.63 | 0.35 |
| 2 | 30/74 (40.5%) | 23/59 (39.0%) | 1.02 (0.67-1.55); 0.93 | 1.04 (0.68-1.58); 0.86 | 0.33 |
| 3 or more | 164/348 (47.1%) | 104/277 (37.5%) | 1.27 (1.05-1.53); 0.01 | 1.22 (1.01-1.46); 0.04 | 0.45 |
| Inflammatory markers above reference range |  |  |  |  |  |
| None | 147/1,291 (11.4%) | 110/1,251 (8.8%) | 1.30 (1.03-1.64); 0.03 | 1.30 (1.04-1.63); 0.02 | *Ref* |
| 1 or more | 141/168 (83.9%) | 93/112 (83.0%) | 1.00 (0.9-1.12); 0.93 | 1.00 (0.9-1.11); 0.94 | 0.03 |
| CI: confidence interval; RR: relative risk; SES: socioeconomic status  aAdjusted models controlled for age and race/ethnicity  bThe interaction p-value indicates if the association between male sex and hospitalization significantly differs between the given category and the reference category  We defined hospitalization based on whether they had a record of inpatient admission following their COVID-19 diagnosis (may not necessarily meet the criteria for severe COVID-19 disease) | | | | | |

**Supplemental Table 3.** Association of male sex with death among individuals who received a positive SARS-CoV-2 PCR test

|  | **Males** | **Females** | **Unadjusted** | **Adjusteda** |  |
| --- | --- | --- | --- | --- | --- |
|  | Deaths/  Individuals (%) | Deaths/  Individuals(%) | RR (95% CI) p-value | RR (95% CI) p-value | Interaction p-valueb |
| Overall | 64/1,469 (4.4%) | 42/1,372 (3.1%) | 1.42 (0.97-2.09); 0.07 | 1.58 (1.10-2.26); 0.01 | -- |
| Age |  |  |  |  |  |
| 0-49 years | 8/845 (0.9%) | 2/846 (0.2%) | 4.00 (0.85-18.80); 0.08 | 3.90 (0.80-19.00); 0.09 | *Ref* |
| 50-69 years | 23/443 (5.2%) | 12/362 (3.3%) | 1.57 (0.79-3.11); 0.20 | 1.71 (0.84-3.47); 0.14 | 0.30 |
| 70+ years | 33/181 (18.2%) | 28/164 (17.1%) | 1.07 (0.68-1.69); 0.78 | 1.30 (0.82-2.06); 0.26 | 0.13 |
| Race/ethnicity |  |  |  |  |  |
| Non-Latinx White | 13/367 (3.5%) | 4/283 (1.4%) | 1.60 (0.79-3.24); 0.19 | 1.60 (0.82-3.12); 0.17 | *Ref* |
| Non-Latinx Black | 7/161 (4.3%) | 1/152 (0.7%) | 4.55 (0.58-35.68); 0.15 | 4.24 (0.56-31.85); 0.16 | 0.35 |
| Latinx | 7/340 (2.1%) | 5/300 (1.7%) | 1.18 (0.51-2.74); 0.70 | 1.31 (0.58-2.93); 0.51 | 0.74 |
| Asian/Asian American | 6/84 (7.1%) | 8/97 (8.2%) | 0.96 (0.36-2.58); 0.94 | 1.33 (0.57-3.12); 0.51 | 0.76 |
| Native Alaskan/American/Hawaiian | 3/40 (7.5%) | 1/48 (2.1%) | 2.39 (0.34-16.89); 0.38 | 2.20 (0.30-15.98); 0.43 | 0.81 |
| Socioeconomic status (SES) |  |  |  |  |  |
| Lower SES | 34/605 (5.6%) | 25/528 (4.7%) | 1.18 (0.71-1.96); 0.51 | 1.37 (0.84-2.25); 0.21 | 0.60 |
| Higher SES | 29/619 (4.7%) | 17/654 (2.6%) | 1.75 (0.97-3.16); 0.06 | 1.79 (1.02-3.11); 0.04 | *Ref* |
| Preferred language other than English |  |  |  |  |  |
| Yes | 14/368 (3.8%) | 14/311 (4.5%) | 0.82 (0.40-1.69); 0.59 | 1.21 (0.60-2.42); 0.60 | 0.39 |
| No | 50/1,086 (4.6%) | 27/1,042 (2.6%) | 1.75 (1.11-2.78); 0.02 | 1.75 (1.13-2.70); 0.01 | *Ref* |
| Charlson Comorbidity Index Score |  |  |  |  |  |
| 0 | 6/920 (0.7%) | 4/901 (0.4%) | 1.49 (0.42-5.33); 0.54 | 1.78 (0.53-5.99); 0.35 | *Ref* |
| 1 | 3/122 (2.5%) | 5/129 (3.9%) | 0.62 (0.15-2.61); 0.52 | 0.93 (0.23-3.77); 0.92 | 0.52 |
| 2 | 10/74 (13.5%) | 7/61 (11.5%) | 1.18 (0.48-2.91); 0.72 | 1.29 (0.52-3.2); 0.59 | 0.87 |
| 3 or more | 45/353 (12.7%) | 26/281 (9.3%) | 1.38 (0.87-2.18); 0.17 | 1.36 (0.88-2.09); 0.17 | 0.81 |
| Inflammatory markers above reference range |  |  |  |  |  |
| None | 34/1,299 (2.6%) | 26/1,259 (2.1%) | 1.27 (0.76-2.1); 0.36 | 1.61 (0.99-2.62); 0.06 | *Ref* |
| 1 or more | 30/170 (17.6%) | 16/97 (16.5%) | 1.25 (0.71-2.18); 0.44 | 1.25 (0.73-2.17); 0.42 | 0.69 |
| CI: confidence interval; RR: relative risk; SES: socioeconomic status  aAdjusted models controlled for age and race/ethnicity  bThe interaction p-value indicates if the association between male sex and death significantly differs between the given category and the reference category  We defined death as death by any cause occurring after an individiual’s COVID-19 diagnosis | | | | | |

**Supplemental Table 4.** Evaluation of factors mediating the relationship between male sex and severe COVID-19 disease (using observed, un-imputed inflammatory marker data)

|  | RR | SEa | 95% CI |
| --- | --- | --- | --- |
| Total Causal Effect | 1.50 | 0.48 | (0.57, 2.43) |
| Interventional Direct Effect | 1.41 | 0.45 | (0.52, 2.29) |
| Interventional Indirect Effects |  |  |  |
| Through lower SESb | 0.99 | 0.12 | (0.76, 1.22) |
| Through comorbiditiesc | 1.00 | 0.10 | (0.81, 1.20) |
| Through elevated inflammatory markersd | 1.05 | 0.22 | (0.62, 1.48) |
| Through dependence between the mediators | 1.00 | 0.07 | (0.87, 1.14) |
| RR: relative risk; CI: confidence interval; SE: standard error; SES: socioeconomic status  aStandard errors calculated using nonparametric bootstrapping, which results in different confidence limits relative to main Poisson models of COVID-19 disease severity  bLower SES defined as having income-based insurance or living in an area with ADI percentile >50%  cComorbidities assessed through calculation of ordinal Charlson Comborbidity Index score (range 0-33).  dNumber of inflammatory markers (range 0-8) above the normal reference range were used to assess inflammation status | | | |

**References for Supplemental Materials**

1. Kind AJ, Buckingham WR. Making neighborhood-disadvantage metrics accessible—the neighborhood atlas. *The New England journal of medicine.* 2018;378(26):2456.

2. Area Deprivation Index, 2018 version. 2020. <https://www.neighborhoodatlas.medicine.wisc.edu/> Accessed July 29, 2020.

3. US Centers for Disease Control and Prevention. About Adult BMI. 2020; <https://www.cdc.gov/healthyweight/assessing/bmi/adult_bmi/index.html>. Accessed May 3, 2021.

4. Charlson ME, Pompei P, Ales KL, MacKenzie CR. A new method of classifying prognostic comorbidity in longitudinal studies: development and validation. *Journal of chronic diseases.* 1987;40(5):373-383.

5. UW Laboratory Test Guide. 2021. <https://testguide.labmed.uw.edu/public/>. Accessed February 2, 2021.
